# Supplementary material for: Fe–Nx sites coupled with Fe3C on porous carbon from plastic wastes for oxygen reduction reaction
Source: Royal Society of Chemistry journal article supplement (doi:10.1039/d4cc03683b), 2024-01-01
Supplement: d4cc03683b13.pdf [file d4cc03683b13.pdf]

## Supporting Information

### **Fe-N<sub>x</sub> sites coupled with Fe<sub>3</sub>C on porous carbon from plastic wastes for oxygen reduction reaction**

Xiaole Jiang<sup>‡ a</sup>, Rui Zhang<sup>‡ a</sup>, Qingqing Liao<sup>a</sup>, Hanjun Zhang<sup>a</sup>, Yaoyue Yang<sup>a</sup>, Fan Zhang<sup>\* b</sup>

<sup>a</sup> Laboratory of Fundamental Chemistry of the State Ethnic Commission, School of Chemistry and Environment, Southwest Minzu University, Chengdu 610041, China

<sup>b</sup> Key Laboratory of Green Chemistry and Technology, Ministry of Education, National Engineering Laboratory of Eco-Friendly Polymeric Materials (Sichuan), College of Chemistry, Sichuan University, Chengdu 610065, China.

<sup>‡</sup> These authors contributed equally to this work.

### **List of Contents**

- 1. Materials and methods: materials, characterization methods, synthesis of catalysts, and electrochemical measurement.**
- 2. Material characterization and electrochemical results.**

## **Materials and methods**

### ***1. Materials and chemicals***

Polyethylene terephthalate (PET) was purchased from Xing wang Plastic Material Co. Ltd. (China). Cyanoguanidine (DCD,  $\geq 99\%$ ) was obtained from Shanghai Titan Scientific Co., Ltd. Magnesium oxide (MgO) nanoparticles, perchloric acid ( $\text{HClO}_4$ , 70~72%) and nitric acid ( $\text{HNO}_3$ , 65~68%) were purchased from Chengdu Shu Test Biotechnology Co., Ltd. Iron(II) chloride anhydrous ( $\text{FeCl}_2$ ,  $\geq 99.5\%$ ) was obtained from Shanghai Macklin Biotechnology Co., Ltd. 1,10-phenanthroline monohydrate ( $\text{C}_{12}\text{H}_8\text{N}_2\cdot\text{H}_2\text{O}$ ,  $\geq 98\%$ ) and potassium hydroxide (KOH,  $\geq 85\%$ ) were purchased from Shanghai Aladdin Biochemical Technology Co., Ltd. Commercial Pt/C (40 wt.%) was purchased from Johnson Matthey.

### ***2. Characterizations***

The pyrolysis behavior of PET/MgO/DCD mixture was determined on a thermogravimetric analyzer (TGA, HCT-3, HengJiu, China). The X-ray diffraction (XRD) patterns of all the catalysts were obtained using an X-ray diffractometer (Rigaku, Ultima IV) with Cu K $\alpha$  radiation ( $\lambda = 0.15418$  nm). The morphology and microstructure of the catalysts were investigated by scanning electron microscopy (SEM, Thermo Scientific Apreo 2S) and transmission electron microscopy (TEM, JEOL-JEM 2100F). Raman spectra of all the catalysts were collected by a Horiba LabRAM HR Evolution Raman spectrometer with a 532 nm laser. The chemical states and surface compositions of the catalysts were analyzed by X-ray photoelectron spectrometer (XPS, ESCALAB 250Xi, Thermo Fisher Scientific). All the binding energies were calibrated by the C 1s peak at 284.8 eV. The  $\text{N}_2$  adsorption/desorption isotherms were measured at 77 K with a Quantachrome Autosorb-iQ instrument. The specific surface area and pore size distribution were calculated by the Brunauer-Emmett-Teller (BET) and QSDFT method.

### ***3. Synthesis of catalysts***

#### **3.1 Synthesis of N-C from PET**

Firstly, PET powder was blended with DCD and MgO with a mass ratio of 1:1:9. Then, the mixture was pyrolyzed at 900 °C for 1 h under Ar atmosphere. The resulting product was etched by 0.5 M HNO<sub>3</sub> at room temperature for 16 h, and the final sample named N-C was obtained after washing with deionized water and drying at 80 °C.”

#### **3.2 Synthesis of Fe<sub>3</sub>C/Fe-N-C and Fe-N-C**

Typically, 0.32 mmol FeCl<sub>2</sub> and 1 mmol 1,10-phenanthroline monohydrate were dissolved in 5 mL of deionized water. The solution quickly became a blood-red color, confirming the formation of the Fe-Phen complex. Then 0.2 g of N-C was dispersed in 35 mL of deionized water, and added into the Fe-Phen complex solution, followed by sonication for 2 h. After stirring for 24 h at room temperature, the Fe-Phen/N-C composites were obtained via freeze drying. Subsequently, the obtained Fe-Phen/N-C composites were pyrolyzed at 1000 °C for 1 h under an Ar atmosphere. Finally, the products were acid-leached by 0.5 M HClO<sub>4</sub> at 80 °C for 16 h, and the Fe<sub>3</sub>C/Fe-N-C catalyst was obtained after the washing and drying process. For comparison, the Fe-N-C catalyst was synthesized with a similar procedure, except that the pyrolyzed temperature was 700 °C.

### ***4. Electrochemical measurement***

The electrochemical measurements were carried out with rotating ring-disk electrode (DC-DSR ROTATOR, PHYCHEMI). Glassy carbon (GC) electrodes coated with the catalysts served as the working electrode. 5 mg of electrocatalyst was dispersed in a mixture of 2 ml of ethanol and 50 ul of Nafion solution (5 wt.%). Then, 25 ul of electrocatalyst ink was deposited onto the polished GC with a catalyst loading of 0.3 mg cm<sup>-2</sup>. A Hg/HgO and graphene rod acted as reference electrode and counter electrode, respectively.

The ORR performance of all the catalysts was evaluated in an O<sub>2</sub>-saturated 0.1 M KOH solution. Linear sweep voltammetry (LSV) measurements were carried out by using rotating disk electrode (RDE) with different rotation speeds (400, 600, 900, 1200

and 1600 rpm) at a scan rate of 10 mV s<sup>-1</sup>. All the potentials in this work refer to reversible hydrogen electrode (RHE) by using the equation  $E(\text{RHE})=E(\text{Hg}/\text{HgO})+0.98+0.059\times\text{pH}$ . The kinetic current density ( $J_k$ ) and electron transfer number ( $n$ ) were calculated according to the Koutecky-Levich (K-L) equation:

$$\frac{1}{J}=\frac{1}{J_L}+\frac{1}{J_K}=\frac{1}{B\omega^{\frac{1}{2}}}+\frac{1}{J_K} \quad (1)$$

$$B=0.62nFC_0D_0^{\frac{2}{3}}\nu^{-\frac{1}{6}} \quad (2)$$

where  $J$  is the experimentally measured current density,  $J_k$  and  $J_L$  are the kinetic current density and diffusion-limited current density,  $\omega$  is the angular velocity ( $\omega=2\pi N$ ,  $N$  is the rotation rate),  $F$  is Faraday constant (96485 C·mol<sup>-1</sup>),  $n$  is the electron transferred number,  $C_0$  is the concentration of O<sub>2</sub> in the electrolyte ( $1.2 \times 10^{-6}$  mol·cm<sup>-3</sup>),  $D_0$  is the diffusion coefficient of O<sub>2</sub> ( $1.9 \times 10^{-5}$  cm<sup>2</sup>·s<sup>-1</sup>), and  $\nu$  is the kinetic viscosity of the electrolyte (0.01 cm<sup>2</sup>·s<sup>-1</sup>).

The hydrogen peroxide yield (H<sub>2</sub>O<sub>2</sub>-%), and  $n$  were evaluated by the rotating ring disk electrode (RRDE) measurements. The potential of the platinum ring electrode was kept at 1.2 V (vs. RHE) and the hydrogen peroxide yield and  $n$  were calculated by the following equation:

$$n=\frac{4\times I_{Disk}}{I_{Disk}+I_{Ring}/N} \quad (3)$$

$$(\text{HO}_2^-)\%=\frac{200\times I_{Ring}}{I_{Ring}+I_{Disk}\times N} \quad (4)$$

where  $I_{Disk}$  and  $I_{Ring}$  are the measured disk and ring current.  $N$  is the ring current collection efficiency ( $N=0.37$ ).

Zinc-Air Battery Measurements:

The Zn-air battery (ZAB) was assembled by using the zinc foil, catalyst-loaded carbon paper, and 6 M KOH with 0.2 M ZnCl<sub>2</sub> solution as the anode, cathode, and electrolyte, respectively. The catalyst loading was 0.9 mg cm<sup>-2</sup> for Fe<sub>3</sub>C/Fe-N-C and Pt/C. The performance of the ZAB was measured on a CHI 760E electrochemical

workstation. The galvanostatic discharge stability for the ZABs was carried out at a current density of  $10 \text{ mA cm}^{-2}$ .

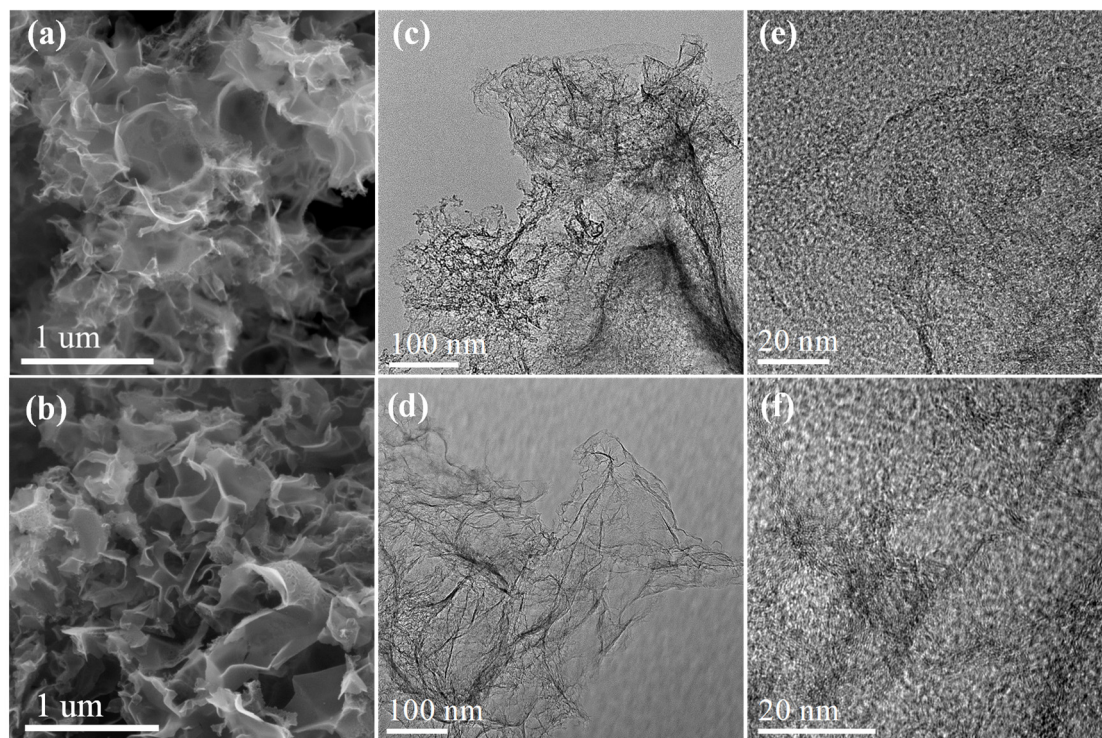

**Fig. S1** SEM image of (a) N-C and (b) Fe-N-C, TEM image of (c) N-C and (d) Fe-N-C, HRTEM image of (e) N-C and (f) Fe-N-C.

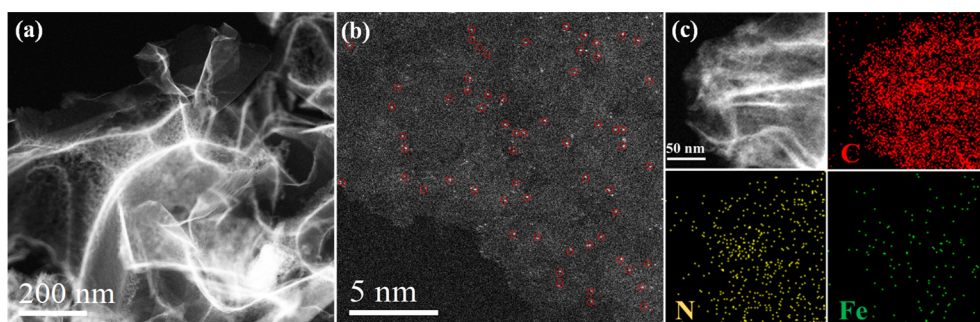

**Fig. S2** (a) TEM image of Fe-N-C, (b) high-resolution HAADF-STEM image of Fe-N-C, (c) low-resolution HAADF-STEM image and the corresponding EDS images for C, N, Fe in Fe-N-C.

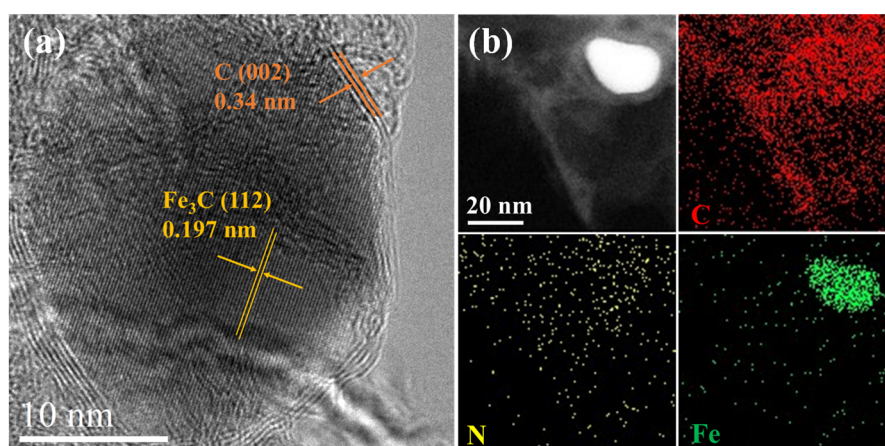

**Fig. S3** (a) HAADF-STEM images of Fe<sub>3</sub>C/Fe-N-C (isolated Fe sites are highlighted by the red circles), (b) HADDF-STEM image and the element mappings of Fe<sub>3</sub>C/Fe-N-C.

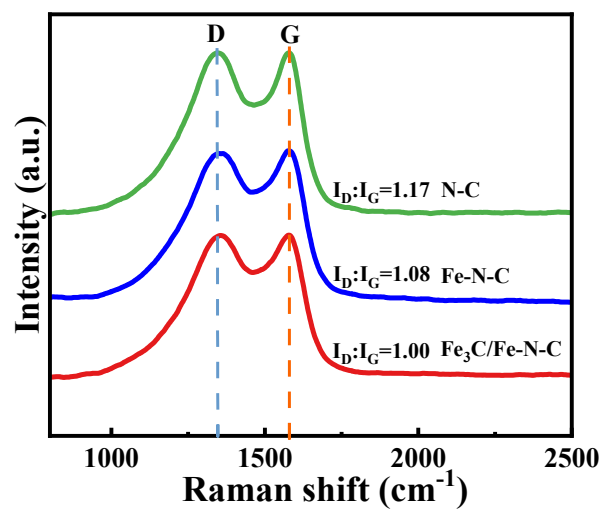

**Fig. S4** Raman spectra of N-C, Fe-N-C and Fe<sub>3</sub>C/Fe-N-C.



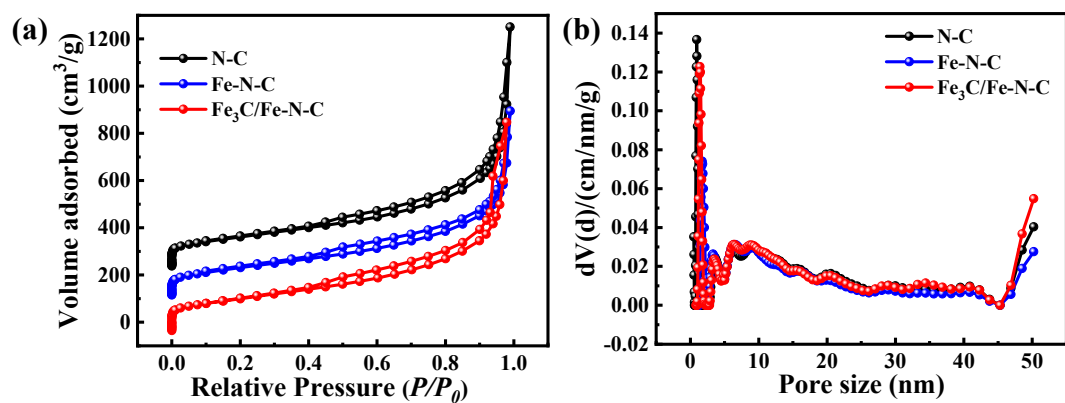

**Fig. S5** (a) N<sub>2</sub> adsorption/desorption isotherms of N-C, Fe-N-C and Fe<sub>3</sub>C/Fe-N-C, (b) Pore size distribution of N-C, Fe-N-C and Fe<sub>3</sub>C/Fe-N-C.

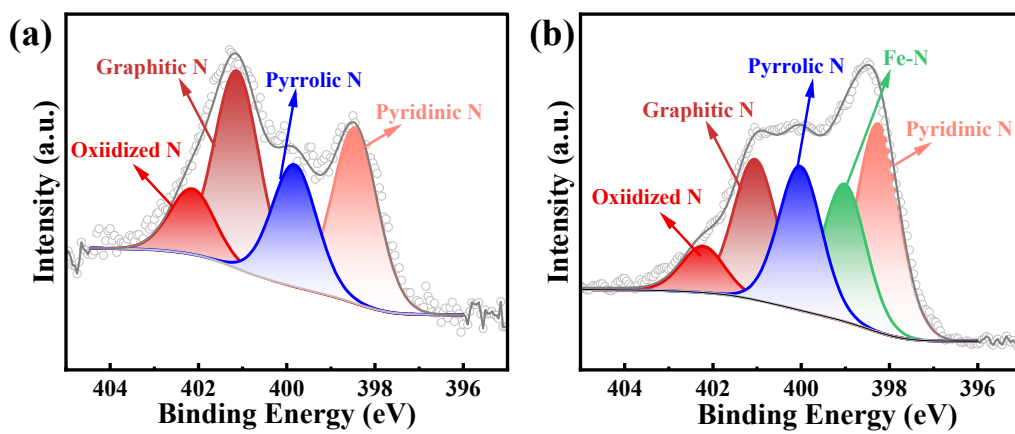

**Fig. S6** High-resolution N 1s spectra of (a) N-C and (b) Fe-N-C.

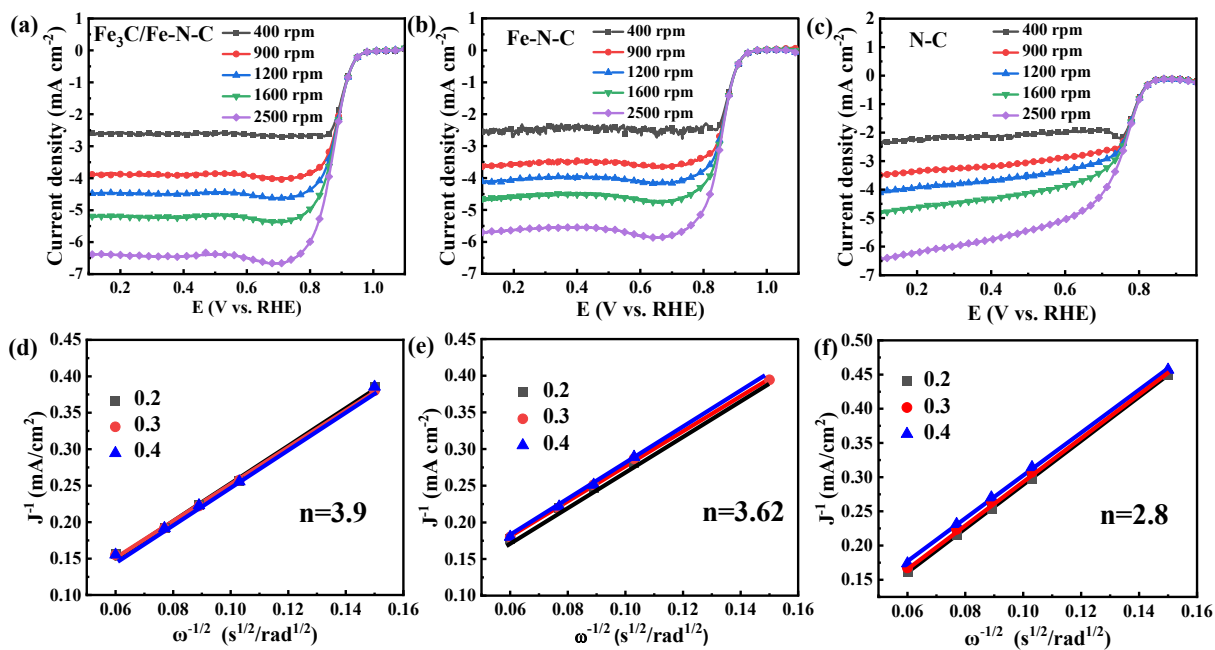

**Fig. S7** LSV curves of (a) Fe<sub>3</sub>C/Fe-N-C, (b) Fe-N-C and (c) N-C at different rotating rates. (d-f) the corresponding K-L plots.

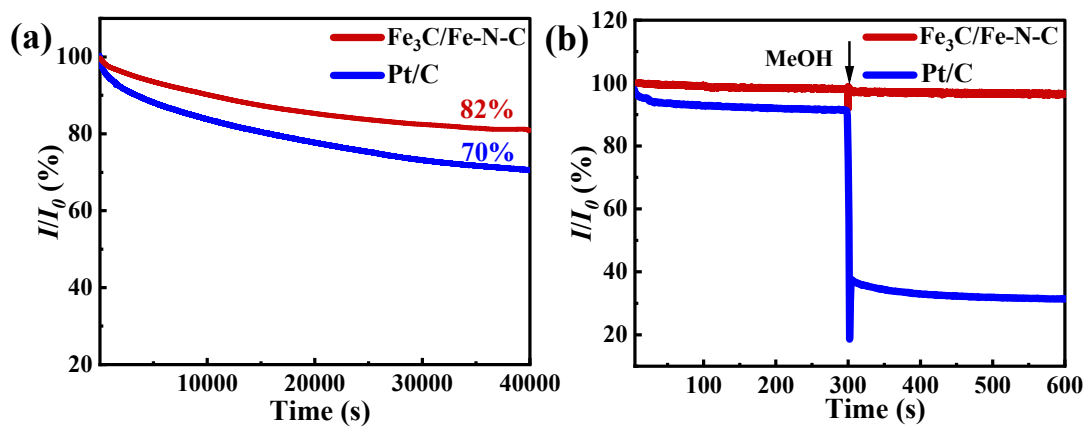

**Fig. S8** (a) Stability and (b) methanol tolerance tests for Fe<sub>3</sub>C/Fe-N-C and Pt/C.

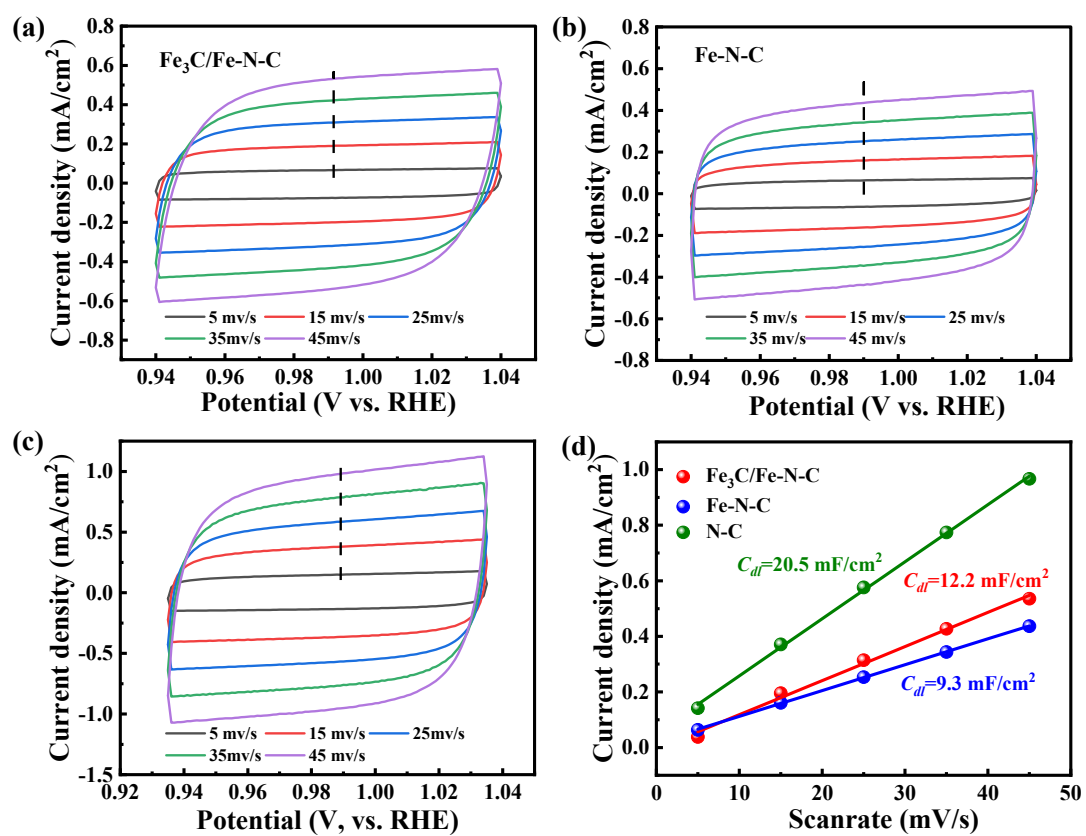

**Fig. S9** (a-c) CV curves for various catalysts at 0.94-1.04 V (vs. RHE), (d) Current density as a function of the scan rate for various catalysts.

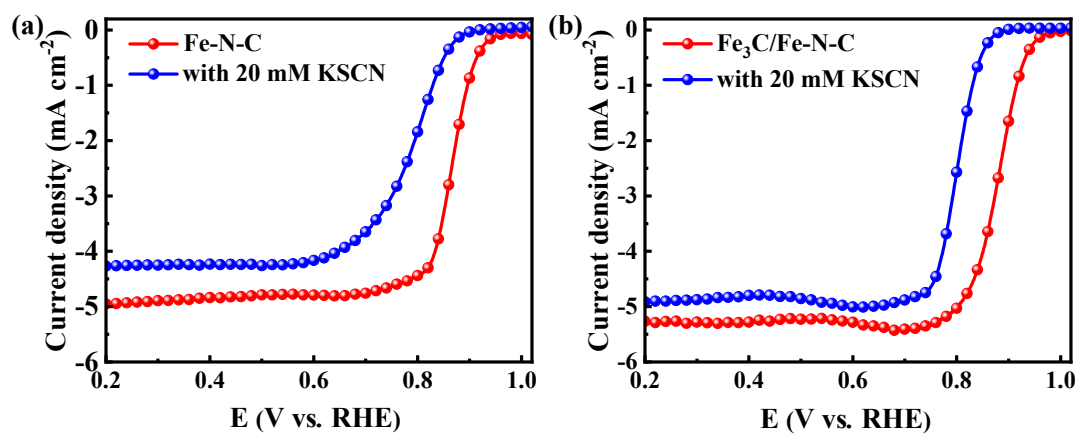

**Fig. S10** The LSV curves of (a) Fe-N-C and (b) Fe<sub>3</sub>C/Fe-N-C in O<sub>2</sub>-saturated 0.1 M KOH electrolyte with and without 20 mM SCN<sup>-</sup>.

**Table S1. Summary of the Brunauer–Emmett-Teller (BET) surface areas and pore size distributions.**

| <b>Sample</b>            | <b>BET surface area<br/>(m<sup>2</sup> g<sup>-1</sup>)</b> | <b>Pore Volume<br/>(cm<sup>3</sup>g<sup>-1</sup>)</b> | <b>Pore Diameter<br/>(nm)</b> |
|--------------------------|------------------------------------------------------------|-------------------------------------------------------|-------------------------------|
| Fe <sub>3</sub> C/Fe-N-C | 480.05                                                     | 1.27                                                  | 3.83                          |
| Fe-N-C                   | 427.19                                                     | 1.13                                                  | 3.82                          |
| N-C                      | 444.15                                                     | 1.51                                                  | 3.81                          |

**Table S2. The element atomic contents of C, N and Fe in various catalysts detected by XPS measurement.**

| <b>Sample</b>                 | <b>Atomic %</b> |          |           |
|-------------------------------|-----------------|----------|-----------|
|                               | <b>C</b>        | <b>N</b> | <b>Fe</b> |
| <b>Fe<sub>3</sub>C/Fe-N-C</b> | 94.35           | 5.18     | 0.47      |
| <b>Fe-N-C</b>                 | 90.41           | 8.98     | 0.62      |
| <b>N-C</b>                    | 94.71           | 5.29     | /         |



**Table S3 Comparison of ORR performance and corresponding ZABs power density of recently reported carbon-based catalysts.**

| <b>Sample</b>                           | <b><math>E_{onset}</math><br/>(V vs. RHE)</b> | <b><math>E_{1/2}</math><br/>(V vs. RHE)</b> | <b>Maximum<br/>Power density<br/>(<math>mW \cdot cm^{-2}</math>)</b> | <b>Reference</b>                                 |
|-----------------------------------------|-----------------------------------------------|---------------------------------------------|----------------------------------------------------------------------|--------------------------------------------------|
| <b>Fe<sub>3</sub>C/Fe-N-C</b>           | 0.99                                          | 0.89                                        | 211                                                                  | This work                                        |
| <b>FeNPs/FeSAs-NC</b>                   | 1.03                                          | 0.87                                        | /                                                                    | Appl. Mater. Interfaces<br>2022, 14, 29986–29992 |
| <b>Fe/Fe<sub>3</sub>C@NC-6</b>          | 0.97                                          | 0.86                                        | /                                                                    | J. Colloid. Interface. Sci.<br>2023, 949, 169863 |
| <b>Fe<sub>3</sub>C@FeSA-NC</b>          | /                                             | 0.88                                        | 164.5                                                                | Nano Res.<br>2023, 16(7): 9371–9378              |
| <b>Fe-NHMCTs</b>                        | 0.99                                          | 0.872                                       | /                                                                    | Adv. Funct. Mater.<br>2021, 31, 2009197          |
| <b>Fe<sub>3</sub>C/N, S-CNS</b>         | 0.98                                          | 0.86                                        | 163                                                                  | Small<br>2023, 19, 2300136                       |
| <b>FeN/C<sub>60</sub>O-900</b>          | 0.98                                          | 0.85                                        | /                                                                    | J. Mater. Chem. A<br>2023, 11, 25534–25544       |
| <b>Fe/Meso-NC-1000</b>                  | 0.97                                          | 0.885                                       | 109.6                                                                | Adv. Mater.<br>2022, 34, 2107291                 |
| <b>Fe SA-NSC-900</b>                    | 0.94                                          | 0.86                                        | /                                                                    | ACS Energy Lett.<br>2021, 6, 379-386             |
| <b>Fe<sub>3</sub>C@MET-M</b>            | /                                             | 0.84                                        | 212                                                                  | Energy Storage Mater.<br>56 (2023) 394–402       |
| <b>FeN<sub>3</sub>OS</b>                | 1.01                                          | 0.874                                       | /                                                                    | Angew. Chem. Int. Ed.<br>2021, 133, 25500-25505  |
| <b>Fe<sub>1</sub>-NS<sub>1.3</sub>C</b> | 0.97                                          | 0.86                                        | /                                                                    | Angew. Chem. Int. Ed.<br>2021, 60, 25404-25410   |
| <b>FeNC-SN-2</b>                        | /                                             | 0.89                                        | 260                                                                  | Adv. Funct. Mater.<br>2021, 31, 2100833          |
| <b>Fe<sub>1</sub>-HNC-500-850</b>       | /                                             | 0.842                                       | /                                                                    | Adv. Mater.<br>2020, 32, 1906905                 |
| <b>Fe<sub>3</sub>C@NCNTs</b>            | /                                             | 0.84                                        | 194                                                                  | Energy Storage Mater.<br>2022, 51, 149-158       |
| <b>FeN<sub>4</sub>-FeNCP@MCF</b>        | /                                             | 0.894                                       | 208.1                                                                | Adv. Funct. Mater.<br>2024, 2315150              |
| <b>Fe@NCNT-rGO</b>                      | 0.896                                         | 0.75                                        | /                                                                    | Materials<br>2020, 13, 4144                      |
| <b>Fe-N-CNT</b>                         | 0.943                                         | 0.811                                       | /                                                                    | ChemSusChem<br>2020, 13, 938–944                 |
| <b>FeNi-OCNT12</b>                      | 1.01                                          | 0.87                                        | /                                                                    | Waste Manage.<br>2020, 109, 119–126              |
| <b>FeMn-N-C</b>                         | 1.05                                          | 0.92                                        | 151                                                                  | Adv. Mater.                                      |

|                              |      |      |     |                                                       |
|------------------------------|------|------|-----|-------------------------------------------------------|
| <b>Fe<sub>1</sub>/SMC-60</b> | 1.05 | 0.9  | 223 | 2024, 36, 2405763<br>Green Carbon<br>2024, 2, 221–230 |
| <b>Fe-ACSA@NC</b>            | 1.03 | 0.9  | 140 | Angew. Chem. Int. Ed.<br>2022, 61, e202116068         |
| <b>Fe-ZIF-8(CZ-A)</b>        | 0.93 | 0.85 | /   | Green Carbon<br>2023, 1, 160–169                      |

---
