# Supplementary figures and images for: Fe–Nx sites coupled with Fe3C on porous carbon from plastic wastes for oxygen reduction reaction
Source: Royal Society of Chemistry journal article supplement (doi:10.1039/d4cc03683b), 2024-01-01

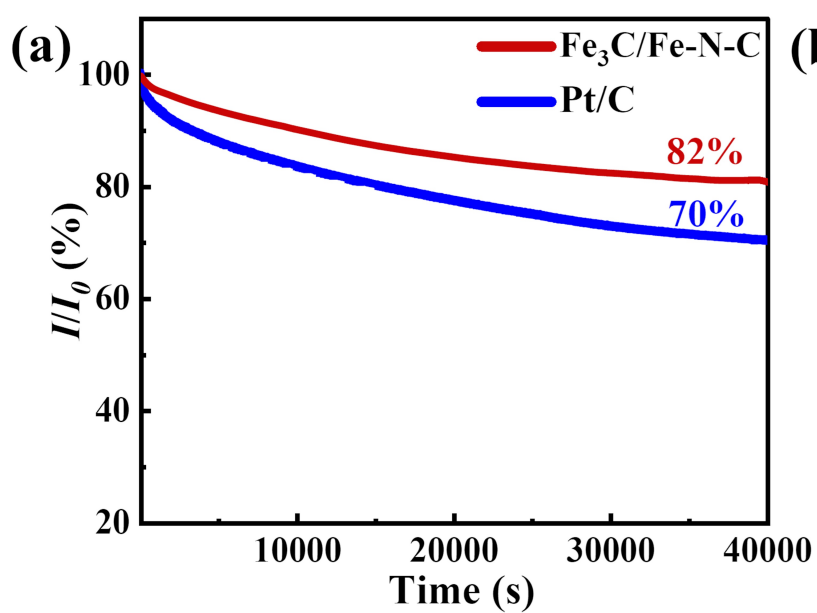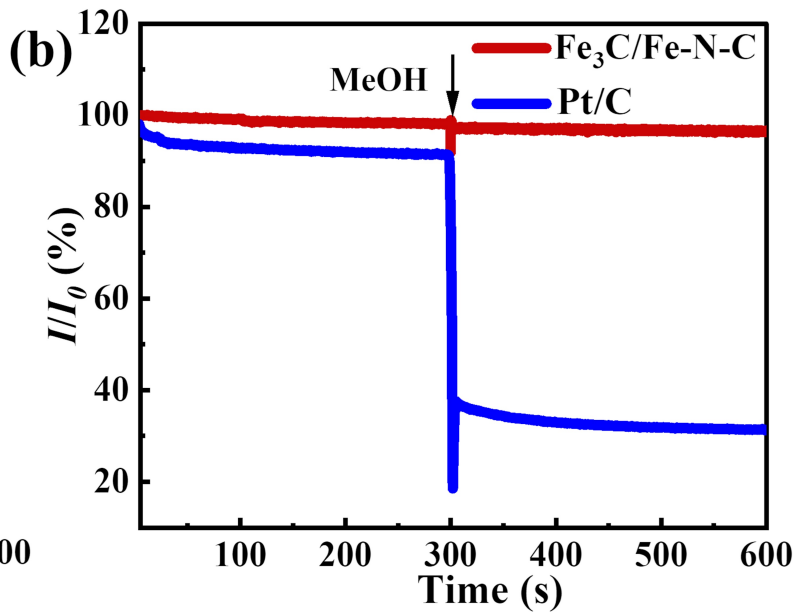

Supplement: d4cc03683b10.pdf [file d4cc03683b10.pdf]

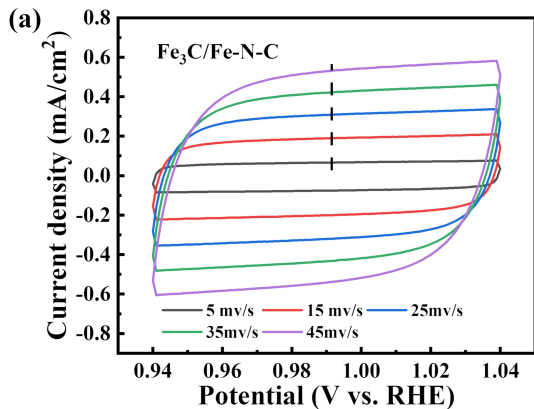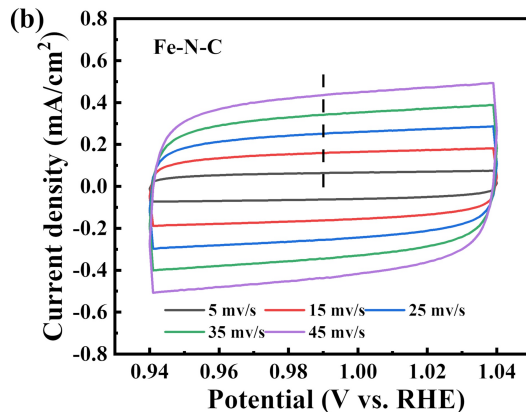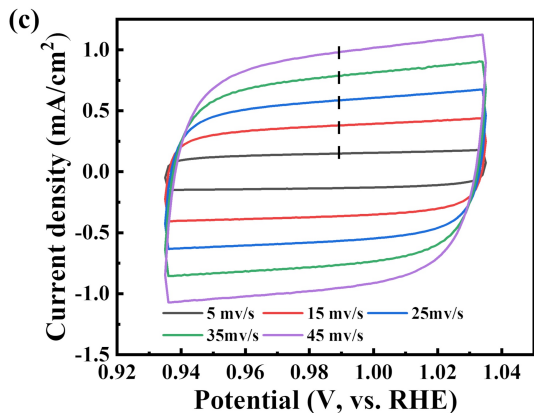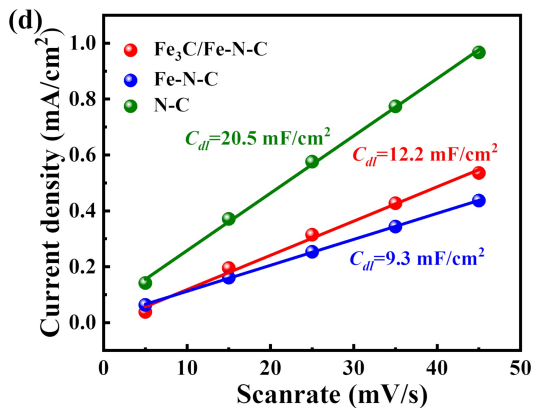

Supplement: d4cc03683b11.pdf [file d4cc03683b11.pdf]

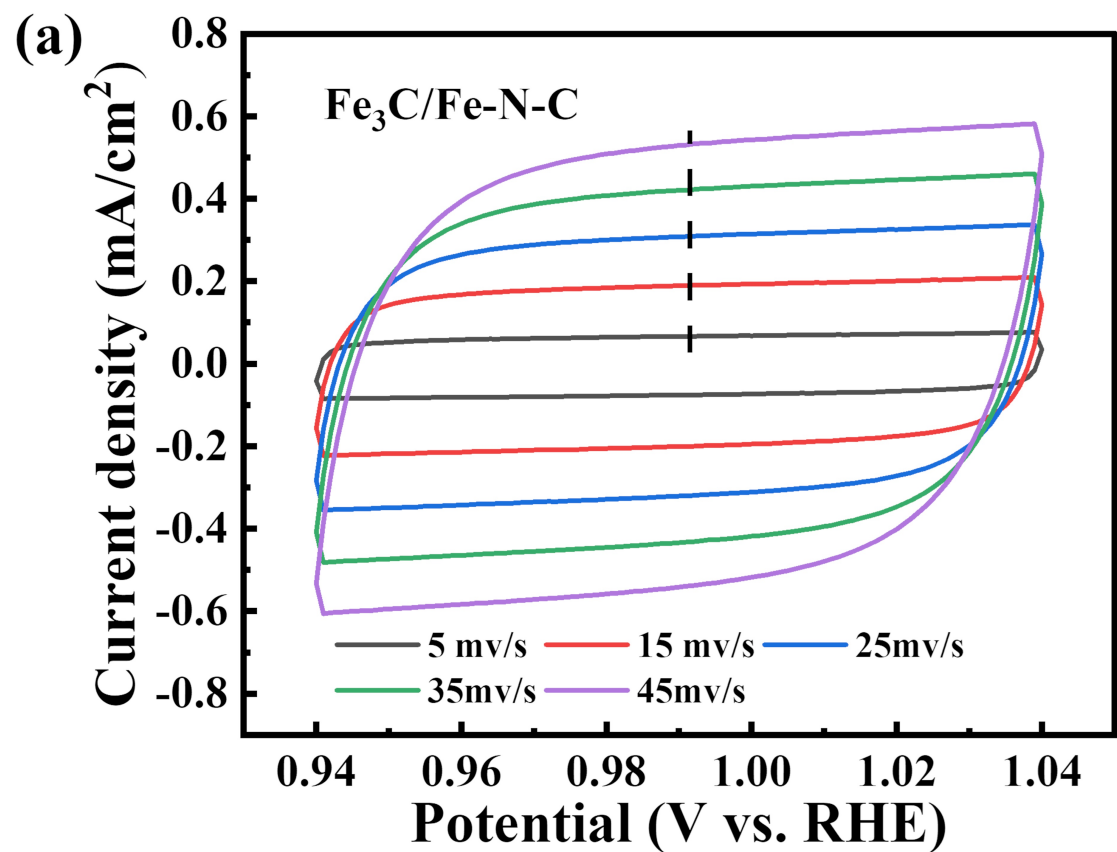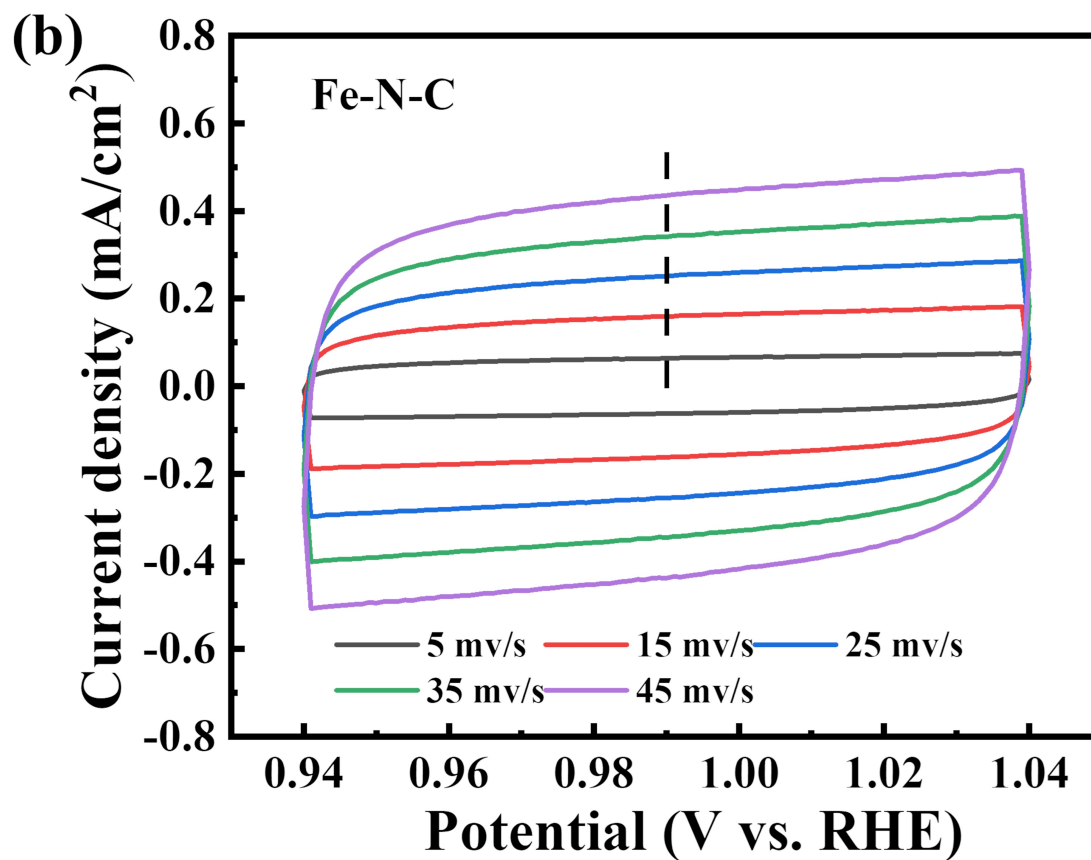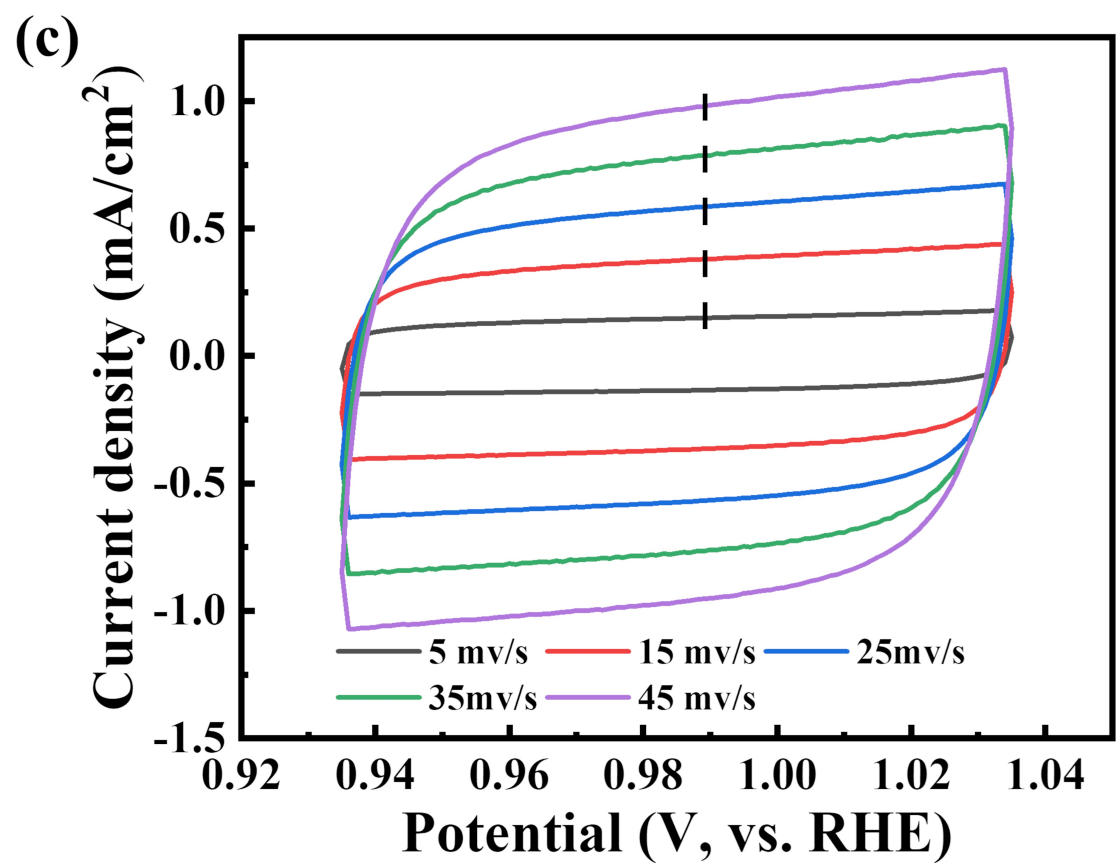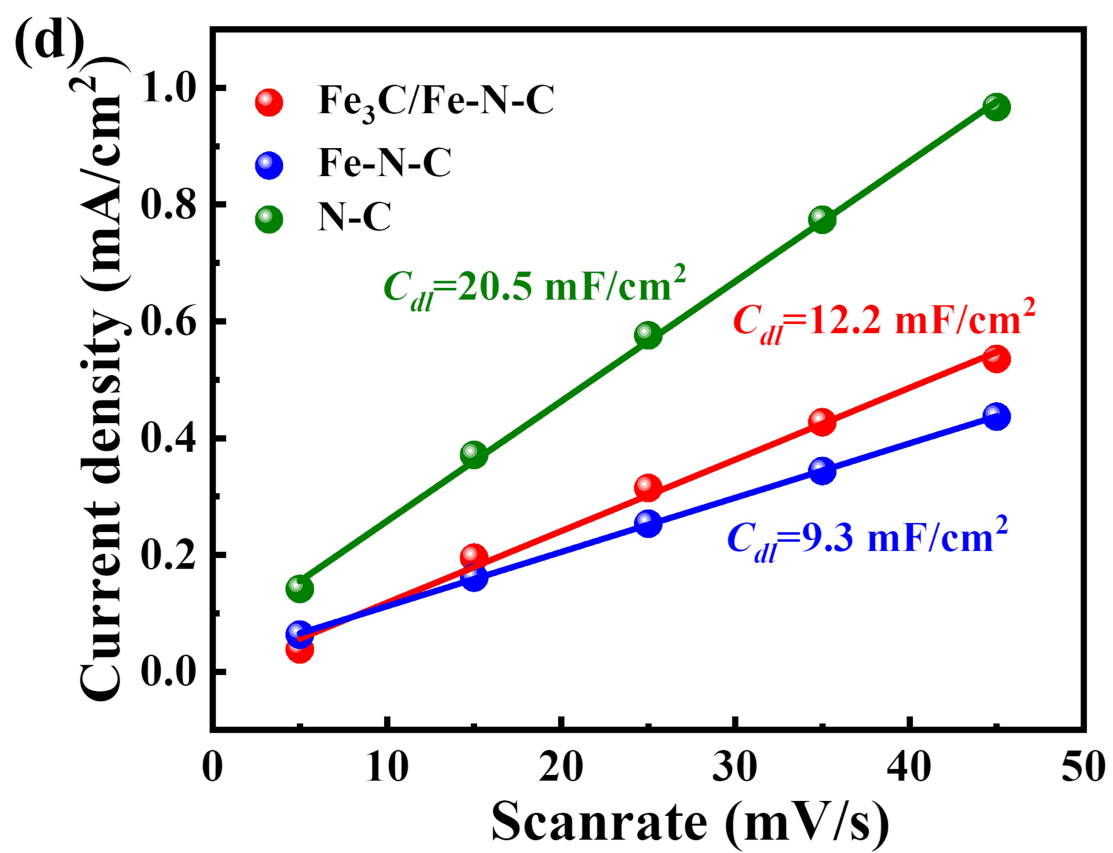

Supplement: d4cc03683b12.pdf [file d4cc03683b12.pdf]

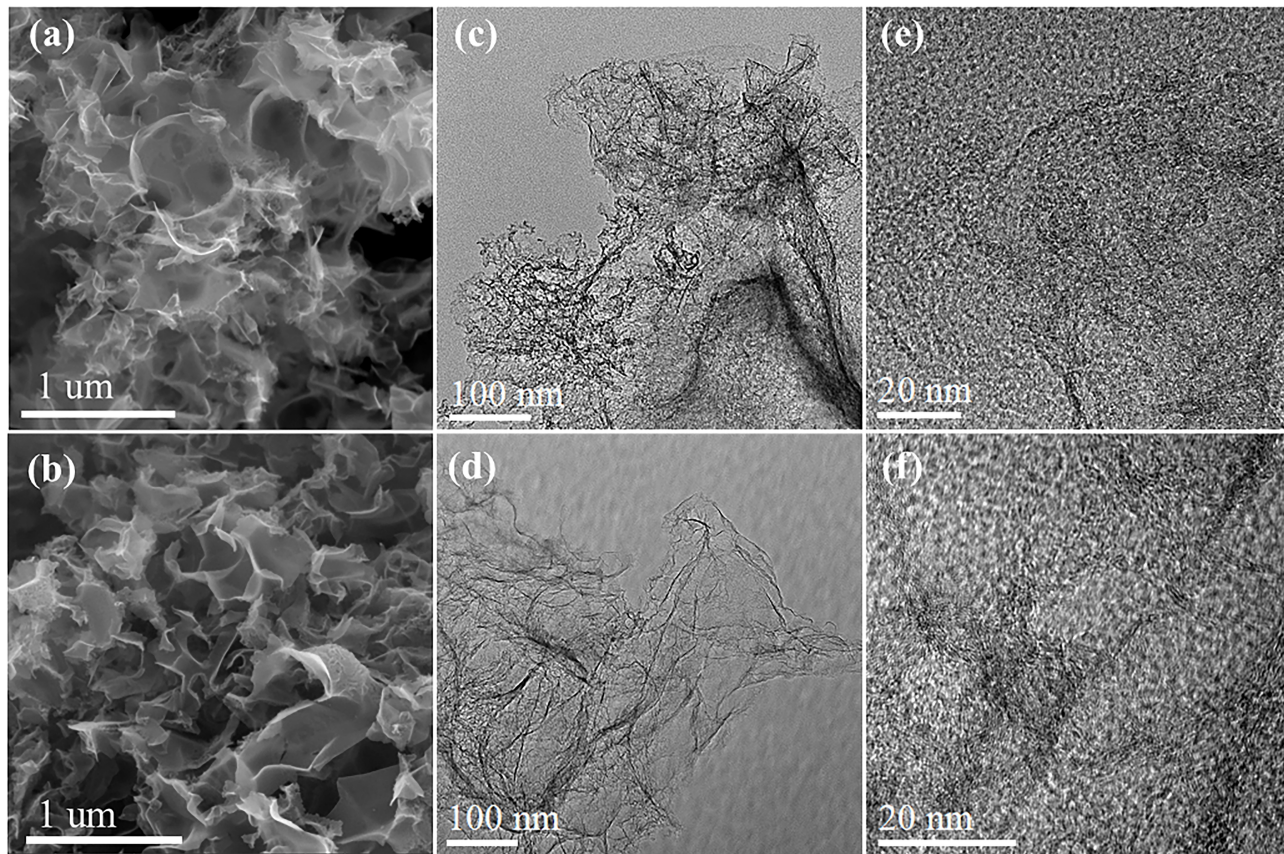

Supplement: d4cc03683b2.pdf [file d4cc03683b2.pdf]

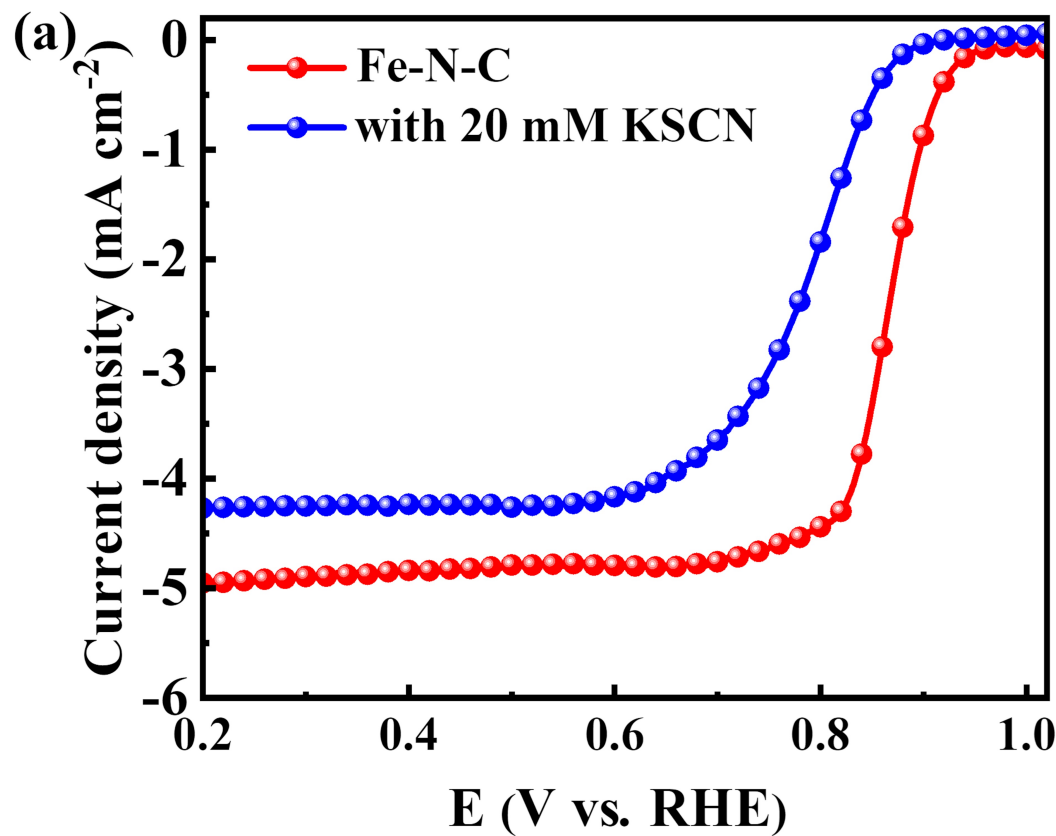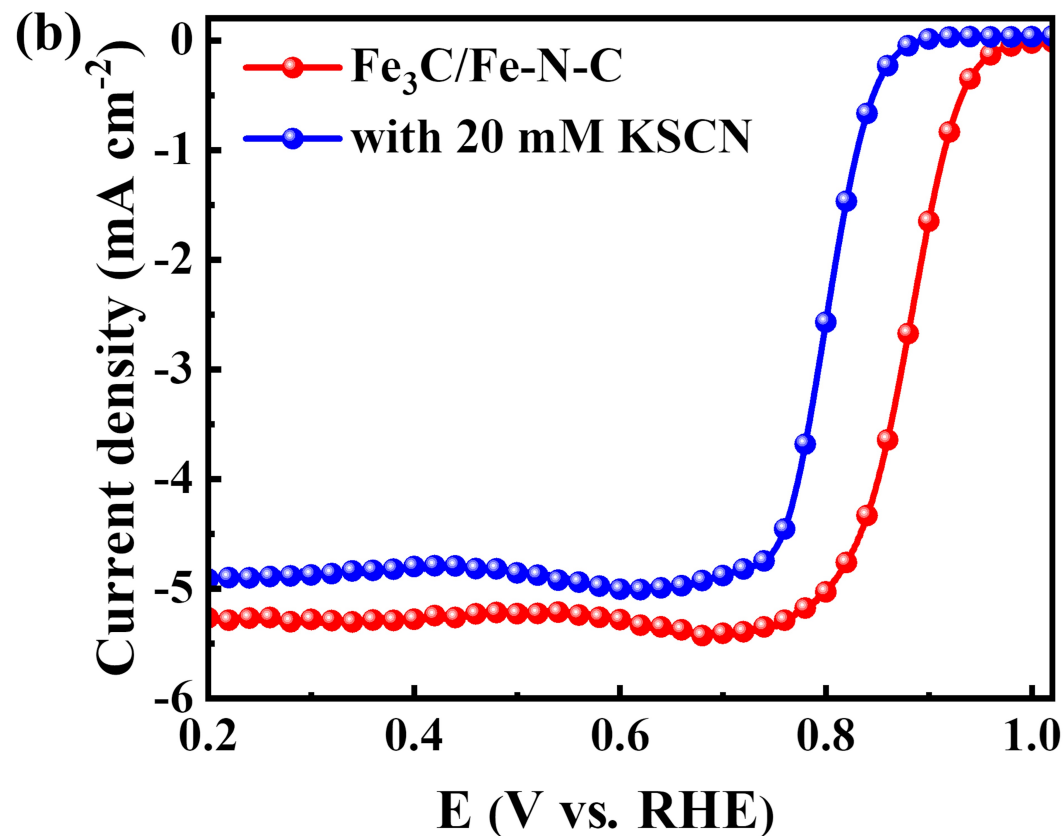

Supplement: d4cc03683b3.pdf [file d4cc03683b3.pdf]

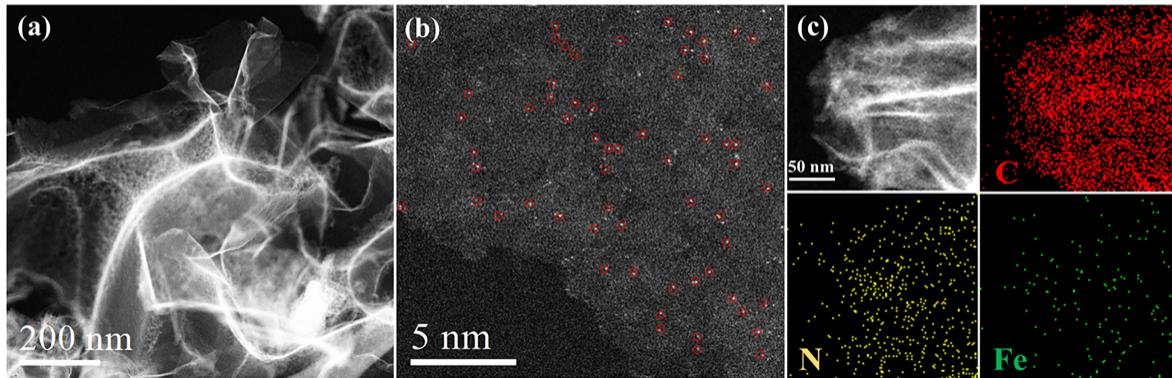

Supplement: d4cc03683b4.pdf [file d4cc03683b4.pdf]

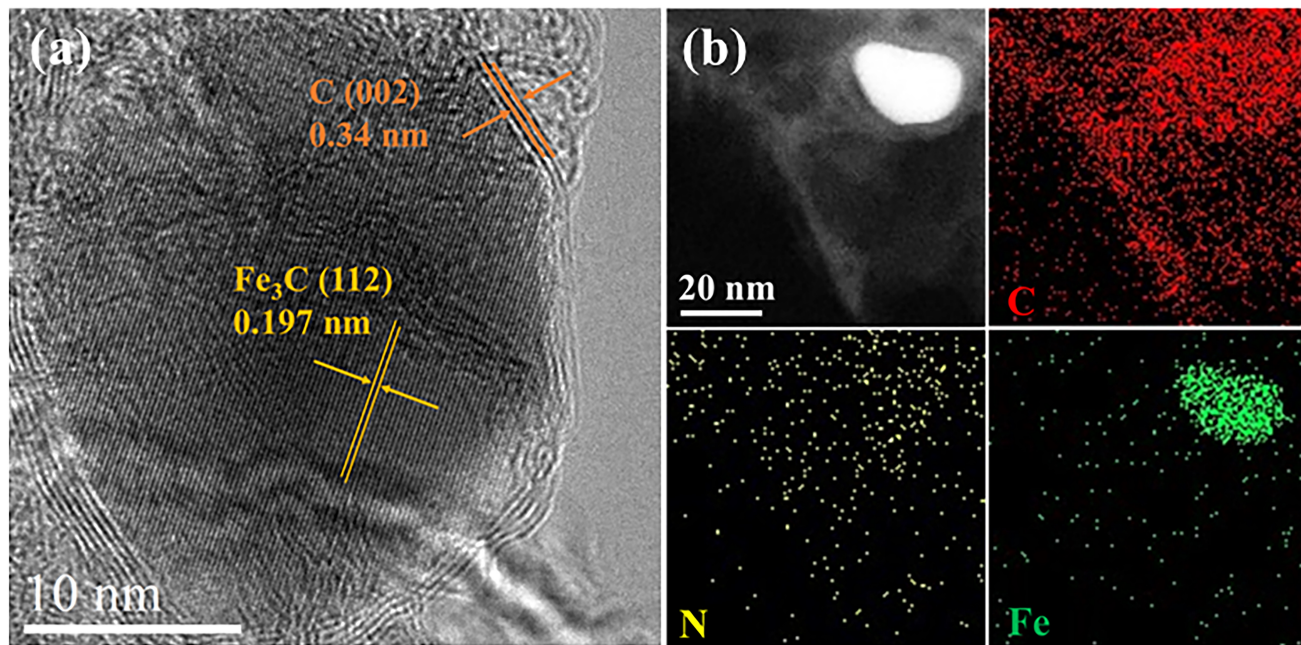

Supplement: d4cc03683b5.pdf [file d4cc03683b5.pdf]

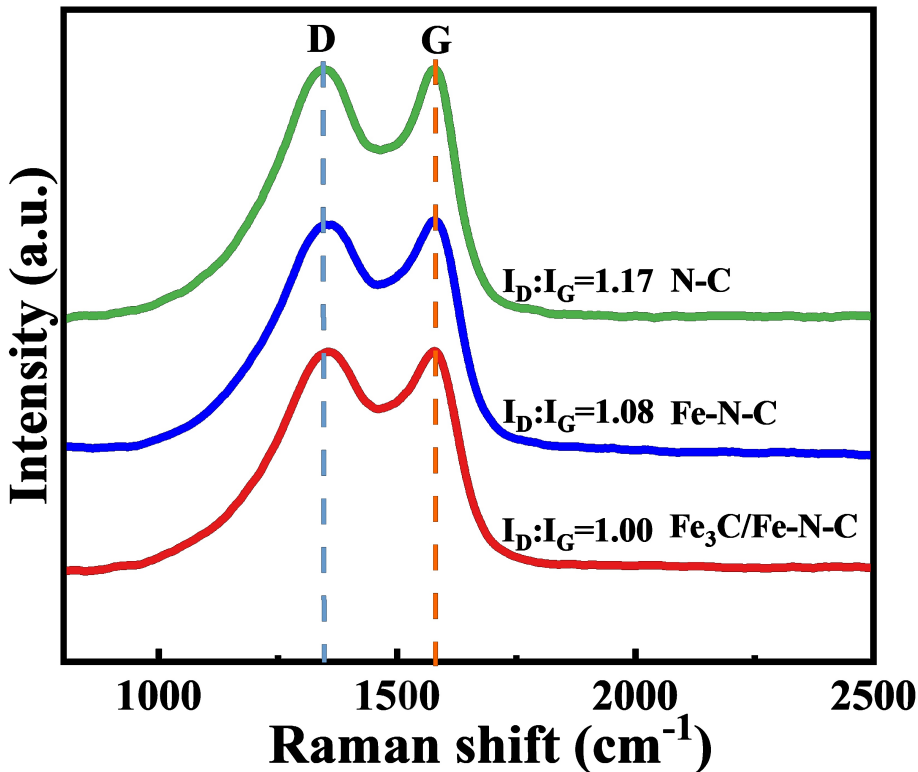

Supplement: d4cc03683b6.pdf [file d4cc03683b6.pdf]

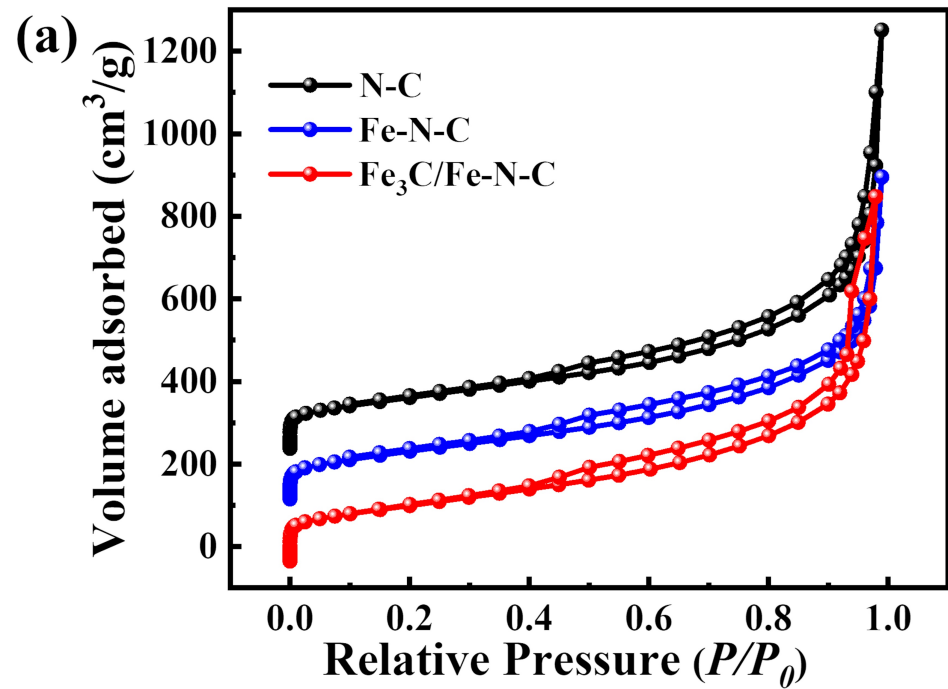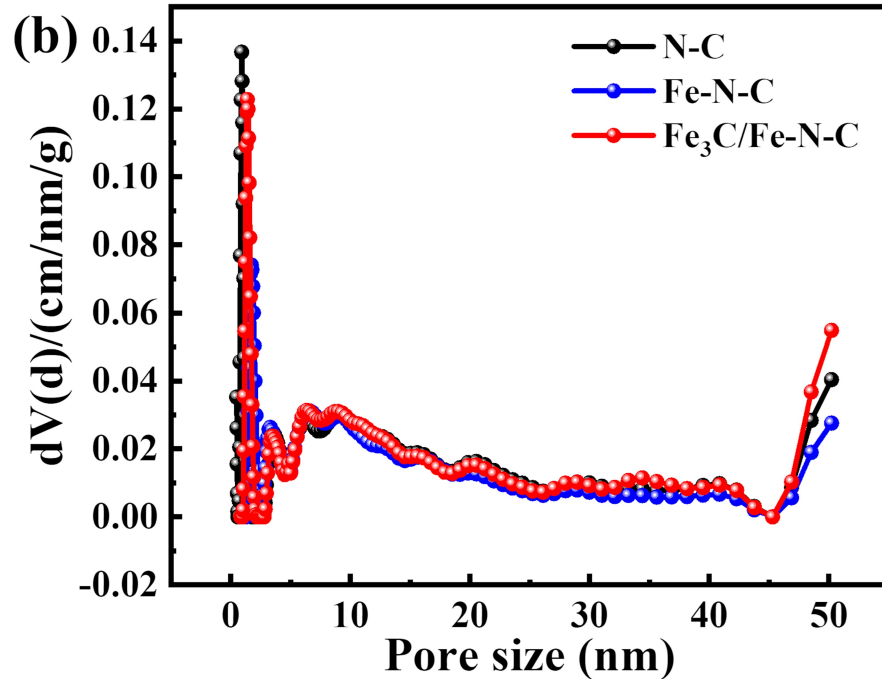

Supplement: d4cc03683b7.pdf [file d4cc03683b7.pdf]

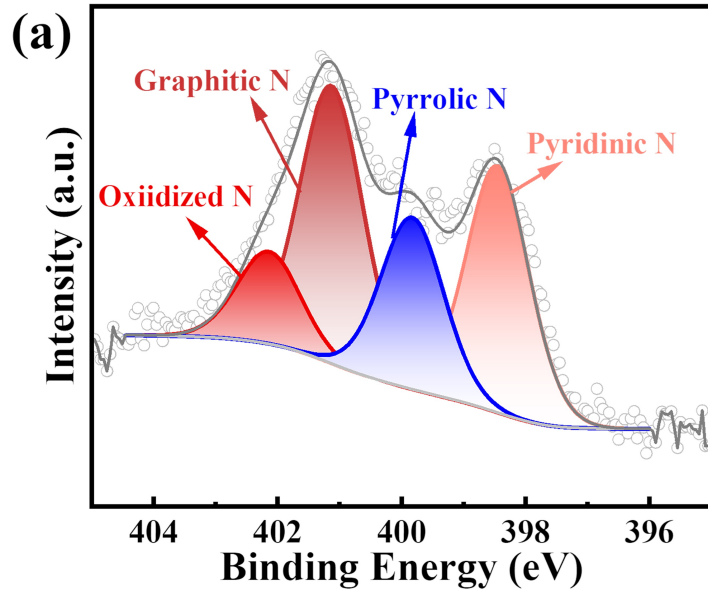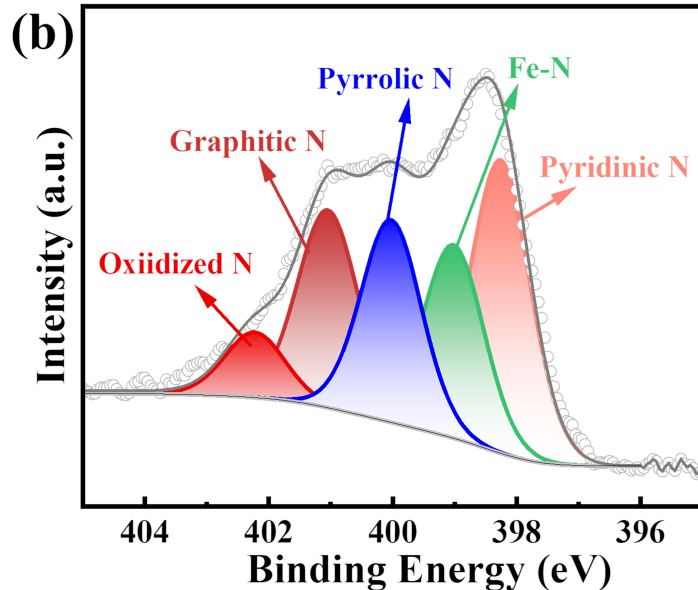

Supplement: d4cc03683b8.pdf [file d4cc03683b8.pdf]

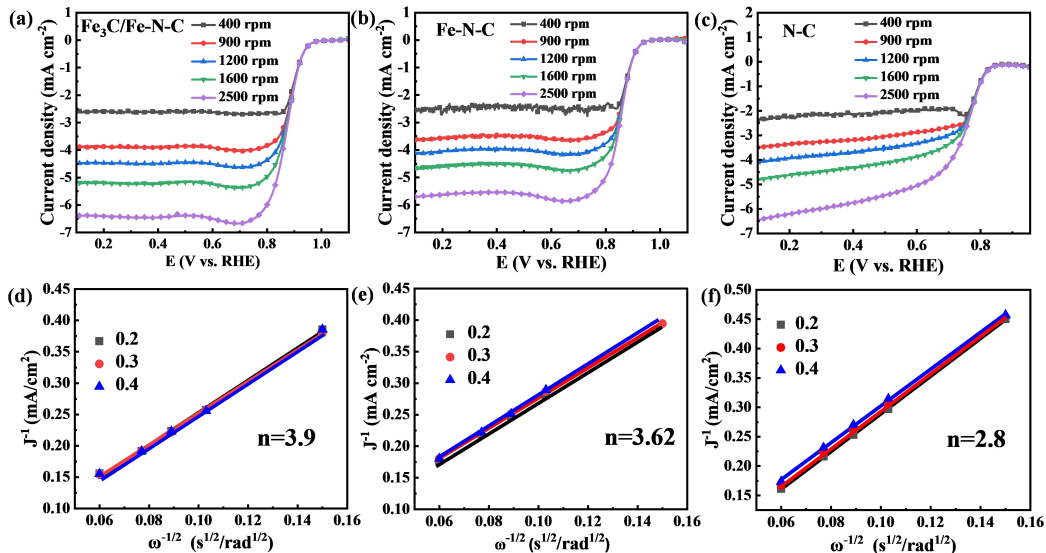

Supplement: d4cc03683b9.pdf [file d4cc03683b9.pdf]
